# Supplementary material
Source: PubMed Central journal article supplement (PMC5123940)
Supplement: NIHMS801066-supplement-2.pdf [file NIHMS801066-supplement-2.pdf]

Table S1. Classification of the Components of the DASH Diet Score Based Primarily on Food Items

| <b>Food/Nutrient</b>   | <b>Description of Food/Nutrient from the ARIC Study</b>                                                        | <b>Scoring Criteria<sup>a</sup></b> |
|------------------------|----------------------------------------------------------------------------------------------------------------|-------------------------------------|
| Sodium                 | Sodium content of foods in food frequency questionnaire                                                        | Quintile 1: 5 points                |
| Red and processed meat | Hamburgers; hot dogs; processed meats (sausage, salami, bologna, etc.); bacon;                                 | Quintile 2: 4 points                |
|                        | beef, pork, or lamb                                                                                            | Quintile 3: 3 points                |
| Sweetened beverages    | Regular soft drinks (Coke, Pepsi, 7-Up, ginger ale); fruit-flavored punch or                                   | Quintile 4: 2 points                |
|                        | non-carbonated beverages (lemonade, Kool-Aid, Hawaiian Punch)                                                  | Quintile 5: 1 point                 |
| Fruits                 | Fresh apples or pears; oranges; orange or grapefruit juice; peaches, apricots, or plums; bananas; other fruits |                                     |
| Vegetables             | Broccoli; cabbage, cauliflower, brussels sprouts; carrots; corn; spinach,                                      | Quintile 1: 1 point                 |
|                        | collards, or other greens; dark yellow, winter, squash (acorn, butternut); sweet                               | Quintile 2: 2 points                |
|                        | potatoes; tomatoes                                                                                             | Quintile 3: 3 points                |
| Nuts and legumes       | Nuts; peanut butter; beans (string beans, green beans); peas or lima beans;                                    | Quintile 4: 4 points                |
|                        | beans or lentils                                                                                               | Quintile 5: 5 points                |
| Whole grains           | Cooked cereals (oatmeal, grits, cream of wheat); dark or whole grain bread                                     |                                     |
| Low-fat dairy          | Skim or low-fat milk, yogurt, cottage cheese or ricotta cheese                                                 |                                     |

<sup>a</sup> Participants received higher scores for lower intake of: 1) sodium, 2) red and processed meats, and 3) sweetened beverages. Participants received higher scores for higher intake of: 4) fruits, 5) vegetables, 6) nuts and legumes, 7) whole grains, and 8) low-fat dairy.
