# Supplementary material
Source: PubMed Central journal article supplement (PMC5123940)
Supplement: NIHMS801066-supplement-3.pdf [file NIHMS801066-supplement-3.pdf]

Table S2. Classification<sup>a</sup> of the Components of the DASH Diet Score Based on Nutrients

| Nutrient <sup>b</sup>       | Target Level | Intermediate Level | Neither Target nor Intermediate Level |
|-----------------------------|--------------|--------------------|---------------------------------------|
|                             | (1 point)    | (0.5 points)       | (0 points)                            |
| Saturated fat (%kcal)       | ≤6           | >6-11              | >11                                   |
| Total fat (%kcal)           | ≤27          | >27-32             | >32                                   |
| Cholesterol (mg/1,000 kcal) | ≤71.4        | >71.4-107.1        | >107.1                                |
| Sodium (mg/1,000 kcal)      | ≤1,143       | >1,143-1,286       | >1,286                                |
| Protein (%kcal)             | ≥18          | 16.5-<18           | <16.5                                 |
| Fiber (g/1,000 kcal)        | ≥14.8        | 9.5-<14.8          | <9.5                                  |
| Magnesium (mg/1,000 kcal)   | ≥238         | 158-<238           | <158                                  |
| Calcium (mg/1,000 kcal)     | ≥590         | 402-<590           | <402                                  |
| Potassium (mg/1,000 kcal)   | ≥2,238       | 1,534-<2,238       | <1,534                                |

<sup>a</sup> Nutrients were indexed to total caloric intake and then classified as target level (1 point), intermediate level (0.5 points), or neither target nor intermediate level (0 points) based on pre-determined thresholds.

<sup>b</sup> Reliability coefficients<sup>1</sup>: saturated fat: 0.43-0.63; total fat: 0.48-0.62; cholesterol: 0.41-0.61; protein: 0.45-0.64; fiber: 0.41-0.63; calcium: 0.26-0.69; potassium: 0.42-0.66

1. Stevens J, Metcalf PA, Dennis BH, Tell GS, Shimakawa T, Folsom AR. Reliability of a food frequency questionnaire by ethnicity, gender, age and education. *Nutrition Research*. 1996;16(5):735-745.
