# Supplementary material
Source: PubMed Central journal article supplement (PMC5123940)
Supplement: NIHMS801066-supplement-4.pdf [file NIHMS801066-supplement-4.pdf]

Table S3. Description<sup>a</sup> of Dietary Intake for the Overall Study Population and According to Case Status

|                                      | Overall Study<br>Population | Kidney Disease | No Kidney<br>Disease |
|--------------------------------------|-----------------------------|----------------|----------------------|
| DASH diet score                      | 24.0 (5.0)                  | 23.8 (5.1)     | 24.0 (5.0)           |
| Alternative DASH diet score          | 3.4 (1.5)                   | 3.4 (1.4)      | 3.5 (1.5)            |
| Sodium, mg/day                       | 1,486 (547)                 | 1,496 (559)    | 1,483 (544)          |
| Red and processed meat, servings/day | 1.1 (0.7)                   | 1.1 (0.8)      | 1.1 (0.7)            |
| Sweetened beverages, glasses/day     | 0.5 (0.8)                   | 0.6 (0.8)      | 0.5 (0.8)            |
| Fruits, servings/day                 | 2.1 (1.5)                   | 2.1 (1.4)      | 2.1 (1.5)            |
| Vegetables, servings/day             | 1.3 (0.9)                   | 1.3 (0.9)      | 1.3 (0.9)            |
| Nuts and legumes, servings/day       | 0.9 (0.7)                   | 0.9 (0.7)      | 0.9 (0.7)            |
| Whole grains, servings/day           | 1.0 (0.9)                   | 0.9 (0.9)      | 1.0 (0.9)            |
| Low-fat dairy products, servings/day | 0.9 (0.9)                   | 0.8 (0.9)      | 0.9 (1.0)            |
| Saturated fat, g/day                 | 22.0 (10.7)                 | 22.2 (11.0)    | 21.9 (10.6)          |
| Total fat, g/day                     | 59.9 (27.0)                 | 60.6 (27.6)    | 59.7 (26.8)          |
| Cholesterol, mg/day                  | 249 (119)                   | 253 (117)      | 248 (119)            |
| Fiber, g/day                         | 17.3 (7.4)                  | 17.3 (7.4)     | 17.3 (7.4)           |
| Magnesium, mg/day                    | 254 (86)                    | 250 (85)       | 255 (87)             |
| Calcium, mg/day                      | 659 (338)                   | 648 (329)      | 662 (340)            |
| Potassium, mg/day                    | 2,648 (888)                 | 2,629 (887)    | 2,654 (889)          |
| Protein, g/day                       | 71.3 (28)                   | 71.6 (27.9)    | 71.2 (27.5)          |

<sup>a</sup> Mean (standard deviation)
