# Supplementary material
Source: PubMed Central journal article supplement (PMC5123940)
Supplement: NIHMS801066-supplement-5.pdf [file NIHMS801066-supplement-5.pdf]

Table S4. Baseline Demographic and Clinical Characteristics for Included Study Participants, Excluded Study Participants, and the Total ARIC Study Population<sup>a</sup>

|                                         | Included Study<br>Participants | Excluded Study<br>Participants | Total ARIC<br>Study Population |
|-----------------------------------------|--------------------------------|--------------------------------|--------------------------------|
| N (%)                                   | 14,882 (94.2%)                 | 910 (5.8%)                     | 15,792 (100%)                  |
| Age, years                              | 54.1 (5.7)                     | 54.8 (6.0)                     | 54.2 (5.8)                     |
| Female, % (n)                           | 55.1 (8,206)                   | 55.4 (504)                     | 55.2 (8,710)                   |
| African-American, % (n)                 | 26.0 (3,869)                   | 43.6 (397)                     | 27.0 (4,266)                   |
| Diabetes, % (n)                         | 11.4 (1,687)                   | 23.3 (183)                     | 12.0 (1,870)                   |
| Hypertension, % (n)                     | 34.2 (5,086)                   | 50.4 (418)                     | 35.0 (5,504)                   |
| SBP, mmHg                               | 121.0 (18.6)                   | 126.6 (23.3)                   | 121.4 (19.0)                   |
| Current smoker, % (n)                   | 26.1 (3,888)                   | 27.1 (244)                     | 26.2 (4,132)                   |
| At least HS graduate, % (n)             | 76.7 (11,419)                  | 65.6 (579)                     | 76.1 (11,998)                  |
| Physical activity index                 | 2.44 (0.79)                    | 2.30 (0.77)                    | 2.43 (0.79)                    |
| Serum creatinine, mg/dL                 | 0.72 (0.18)                    | 1.16 (1.69)                    | 0.74 (0.42)                    |
| eGFR, mL/min/1.73 m <sup>2</sup>        | 103.2 (14.3)                   | 88.0 (30.3)                    | 102.5 (15.8)                   |
| BMI $\geq$ 25 kg/m <sup>2</sup> , % (n) | 66.6 (9,914)                   | 72.3 (640)                     | 66.9 (10,554)                  |
| Caloric intake, kcal/day                | 1620 (551)                     | 1553 (611)                     | 1618 (553)                     |

<sup>a</sup> Mean (standard deviation) for continuous variables; proportion (frequency) for categorical variables

ARIC, Atherosclerosis Risk in Communities; BMI, body mass index; eGFR, estimated glomerular filtration rate; HS, high school; SBP, systolic blood pressure

Conversion factor for creatinine in mg/dL to  $\mu$ mol/L, x88.4.
