# Supplementary material
Source: PubMed Central journal article supplement (PMC5123940)
Supplement: NIHMS801066-supplement-6.pdf [file NIHMS801066-supplement-6.pdf]

Table S5. Risk of Kidney Disease by Tertile of the Alternative DASH Diet Score Based on Nutrients

|         | Tertile of the Alternative DASH Diet Score (Nutrients) |                   |                    | P-value<br>for trend |
|---------|--------------------------------------------------------|-------------------|--------------------|----------------------|
|         | Tertile 1 (0-2.5):                                     | Tertile 2 (3-4):  | Tertile 3 (4.5-9): |                      |
|         | Low Score                                              | Moderate Score    | High Score         |                      |
| Model 1 | 1.06 (0.97, 1.15)                                      | 0.96 (0.89, 1.05) | 1 [Reference]      | 0.16                 |
| Model 2 | 1.04 (0.95, 1.14)                                      | 0.93 (0.86, 1.01) | 1 [Reference]      | 0.26                 |
| Model 3 | 1.11 (1.02, 1.22)                                      | 0.94 (0.87, 1.03) | 1 [Reference]      | 0.007                |

Model 1: Adjusted for age, sex, race-center, education level, smoking status, physical activity, total caloric intake

Model 2: Model 1 + baseline eGFR (linear spline terms with one knot at 90 mL/min/1.73 m<sup>2</sup>)

Model 3: Model 2 + overweight/obese status, diabetes, hypertension, systolic blood pressure, use of angiotensin converting enzyme inhibitors or angiotensin receptor blockers
