# Supplementary material
Source: PubMed Central journal article supplement (PMC5123940)
Supplement: NIHMS801066-supplement-7.pdf [file NIHMS801066-supplement-7.pdf]

Table S6. Risk of Kidney Disease by Tertile of the DASH Diet Scores Modified to Exclude Sodium

|         | Tertile of Modified DASH Diet Score (Food Items) |                    |                      | P-value<br>for trend |
|---------|--------------------------------------------------|--------------------|----------------------|----------------------|
|         | Tertile 1 (7-19):                                | Tertile 2 (20-23): | Tertile 3 (24-35):   |                      |
|         | Low Score                                        | Moderate Score     | High Score           |                      |
| Model 1 | 1.10 (1.01, 1.20)                                | 1.09 (1.00, 1.18)  | 1 [Reference]        | 0.02                 |
| Model 2 | 1.09 (1.00, 1.18)                                | 1.06 (0.98, 1.16)  | 1 [Reference]        | 0.047                |
| Model 3 | 1.16 (1.07, 1.26)                                | 1.09 (1.00, 1.19)  | 1 [Reference]        | 0.001                |
|         | Tertile of Modified DASH Diet Score (Nutrients)  |                    |                      | P-value<br>for trend |
|         | Tertile 1 (0-1.5):                               | Tertile 2 (2-3):   | Tertile 3 (3.5-7.5): |                      |
|         | Low Score                                        | Moderate Score     | High Score           |                      |
| Model 1 | 1.04 (0.96, 1.14)                                | 0.96 (0.88, 1.04)  | 1 [Reference]        | 0.30                 |
| Model 2 | 1.03 (0.95, 1.12)                                | 0.93 (0.86, 1.01)  | 1 [Reference]        | 0.40                 |
| Model 3 | 1.11 (1.02, 1.21)                                | 0.95 (0.87, 1.03)  | 1 [Reference]        | 0.01                 |

Model 1: Adjusted for age, sex, race-center, education level, smoking status, physical activity, total caloric intake

Model 2: Model 1 + baseline eGFR (linear spline terms with one knot at 90 mL/min/1.73 m<sup>2</sup>)

Model 3: Model 2 + overweight/obese status, diabetes, hypertension, systolic blood pressure, use of angiotensin converting enzyme inhibitors or angiotensin receptor blockers
