# Supplementary material
Source: PubMed Central journal article supplement (PMC5123940)
Supplement: NIHMS801066-supplement-8.pdf [file NIHMS801066-supplement-8.pdf]

Table S7. Risk of Kidney Disease (Ascertained Based on Estimated Glomerular Filtration Rate) by Tertile of the DASH Diet Score

|         | Tertile of DASH Diet Score     |                                      |                                  | P-value<br>for trend |
|---------|--------------------------------|--------------------------------------|----------------------------------|----------------------|
|         | Tertile 1 (8-22):<br>Low Score | Tertile 2 (23-26):<br>Moderate Score | Tertile 3 (27-40):<br>High Score |                      |
| Model 1 | 1.23 (1.09, 1.37)              | 1.17 (1.04, 1.31)                    | 1 [Reference]                    | <0.001               |
| Model 2 | 1.19 (1.06, 1.34)              | 1.16 (1.03, 1.29)                    | 1 [Reference]                    | 0.003                |
| Model 3 | 1.22 (1.08, 1.36)              | 1.12 (1.00, 1.25)                    | 1 [Reference]                    | 0.001                |

Model 1: Adjusted for age, sex, race-center, education level, smoking status, physical activity, total caloric intake

Model 2: Model 1 + baseline eGFR (linear spline terms with one knot at 90 mL/min/1.73 m<sup>2</sup>)

Model 3: Model 2 + overweight/obese status, diabetes, hypertension, systolic blood pressure, use of angiotensin converting enzyme inhibitors or angiotensin receptor blockers
