# Supplementary material
Source: PubMed Central journal article supplement (PMC5123940)
Supplement: NIHMS801066-supplement-9.pdf [file NIHMS801066-supplement-9.pdf]

Table S8. Risk of Kidney Disease Associated with the Individual Components of the Alternative DASH Diet Score Based on Nutrients

| Nutrient      | Model | Tertile 1:    | Tertile 2:        | Tertile 3:        | P-value<br>for trend |
|---------------|-------|---------------|-------------------|-------------------|----------------------|
|               |       | Low Intake    | Moderate Intake   | High Intake       |                      |
| Saturated fat | 1     | 1 [Reference] | 1.17 (1.05, 1.31) | 1.17 (1.01, 1.35) | 0.09                 |
|               | 2     | 1 [Reference] | 1.16 (1.04, 1.29) | 1.13 (0.98, 1.31) | 0.2                  |
|               | 3     | 1 [Reference] | 1.19 (1.06, 1.33) | 1.17 (1.01, 1.35) | 0.1                  |
| Total fat     | 1     | 1 [Reference] | 0.84 (0.75, 0.94) | 0.95 (0.82, 1.09) | 0.6                  |
|               | 2     | 1 [Reference] | 0.83 (0.74, 0.92) | 0.92 (0.80, 1.06) | 0.3                  |
|               | 3     | 1 [Reference] | 0.85 (0.76, 0.95) | 0.97 (0.84, 1.11) | 0.8                  |
| Cholesterol   | 1     | 1 [Reference] | 0.98 (0.90, 1.07) | 0.96 (0.87, 1.06) | 0.4                  |
|               | 2     | 1 [Reference] | 1.03 (0.94, 1.12) | 1.04 (0.94, 1.15) | 0.5                  |
|               | 3     | 1 [Reference] | 1.00 (0.92, 1.09) | 0.96 (0.87, 1.06) | 0.4                  |
| Sodium        | 1     | 1 [Reference] | 1.01 (0.93, 1.10) | 1.03 (0.94, 1.12) | 0.6                  |
|               | 2     | 1 [Reference] | 1.02 (0.94, 1.11) | 1.02 (0.94, 1.12) | 0.7                  |
|               | 3     | 1 [Reference] | 1.02 (0.94, 1.11) | 1.01 (0.92, 1.10) | 0.9                  |
| Protein       | 1     | 1 [Reference] | 1.16 (1.06, 1.27) | 1.29 (1.16, 1.42) | <0.001               |
|               | 2     | 1 [Reference] | 1.12 (1.03, 1.22) | 1.24 (1.12, 1.37) | <0.001               |
|               | 3     | 1 [Reference] | 1.09 (1.00, 1.19) | 1.12 (1.01, 1.24) | 0.03                 |
| Fiber         | 1     | 1 [Reference] | 0.95 (0.87, 1.03) | 1.08 (0.97, 1.20) | 0.4                  |
|               | 2     | 1 [Reference] | 0.92 (0.85, 1.00) | 1.06 (0.95, 1.17) | 0.6                  |
|               | 3     | 1 [Reference] | 0.91 (0.83, 0.99) | 1.00 (0.90, 1.11) | 0.6                  |

|           |   |               |                   |                   |        |
|-----------|---|---------------|-------------------|-------------------|--------|
|           | 1 | 1 [Reference] | 0.87 (0.79, 0.96) | 0.76 (0.67, 0.86) | <0.001 |
| Magnesium | 2 | 1 [Reference] | 0.91 (0.82, 1.00) | 0.81 (0.71, 0.92) | 0.003  |
|           | 3 | 1 [Reference] | 0.90 (0.82, 0.99) | 0.85 (0.75, 0.97) | 0.03   |
|           | 1 | 1 [Reference] | 0.87 (0.80, 0.94) | 0.82 (0.75, 0.91) | <0.001 |
| Calcium   | 2 | 1 [Reference] | 0.86 (0.79, 0.93) | 0.82 (0.74, 0.90) | <0.001 |
|           | 3 | 1 [Reference] | 0.88 (0.81, 0.96) | 0.85 (0.77, 0.94) | 0.001  |
|           | 1 | 1 [Reference] | 1.00 (0.91, 1.11) | 1.13 (0.99, 1.29) | 0.08   |
| Potassium | 2 | 1 [Reference] | 0.97 (0.88, 1.08) | 1.08 (0.94, 1.23) | 0.3    |
|           | 3 | 1 [Reference] | 0.95 (0.86, 1.05) | 1.05 (0.92, 1.20) | 0.5    |

Model 1: Adjusted for age, sex, race-center, education level, smoking status, physical activity, total caloric intake, and all other factors in the DASH diet score (all nine individual components of the alternative DASH diet score based on nutrients were included in the same model, i.e., 1. saturated fat, 2. total fat, 3. cholesterol, 4. sodium, 5. protein, 6. fiber, 7. magnesium, 8. calcium, 9. potassium)

Model 2: Model 1 + baseline eGFR (linear spline terms with one knot at 90 mL/min/1.73 m<sup>2</sup>)

Model 3: Model 2 + overweight/obese status, diabetes, hypertension, systolic blood pressure, use of angiotensin converting enzyme inhibitors or angiotensin receptor blockers
