# Supplementary material
Source: PubMed Central journal article supplement (PMC5123940)

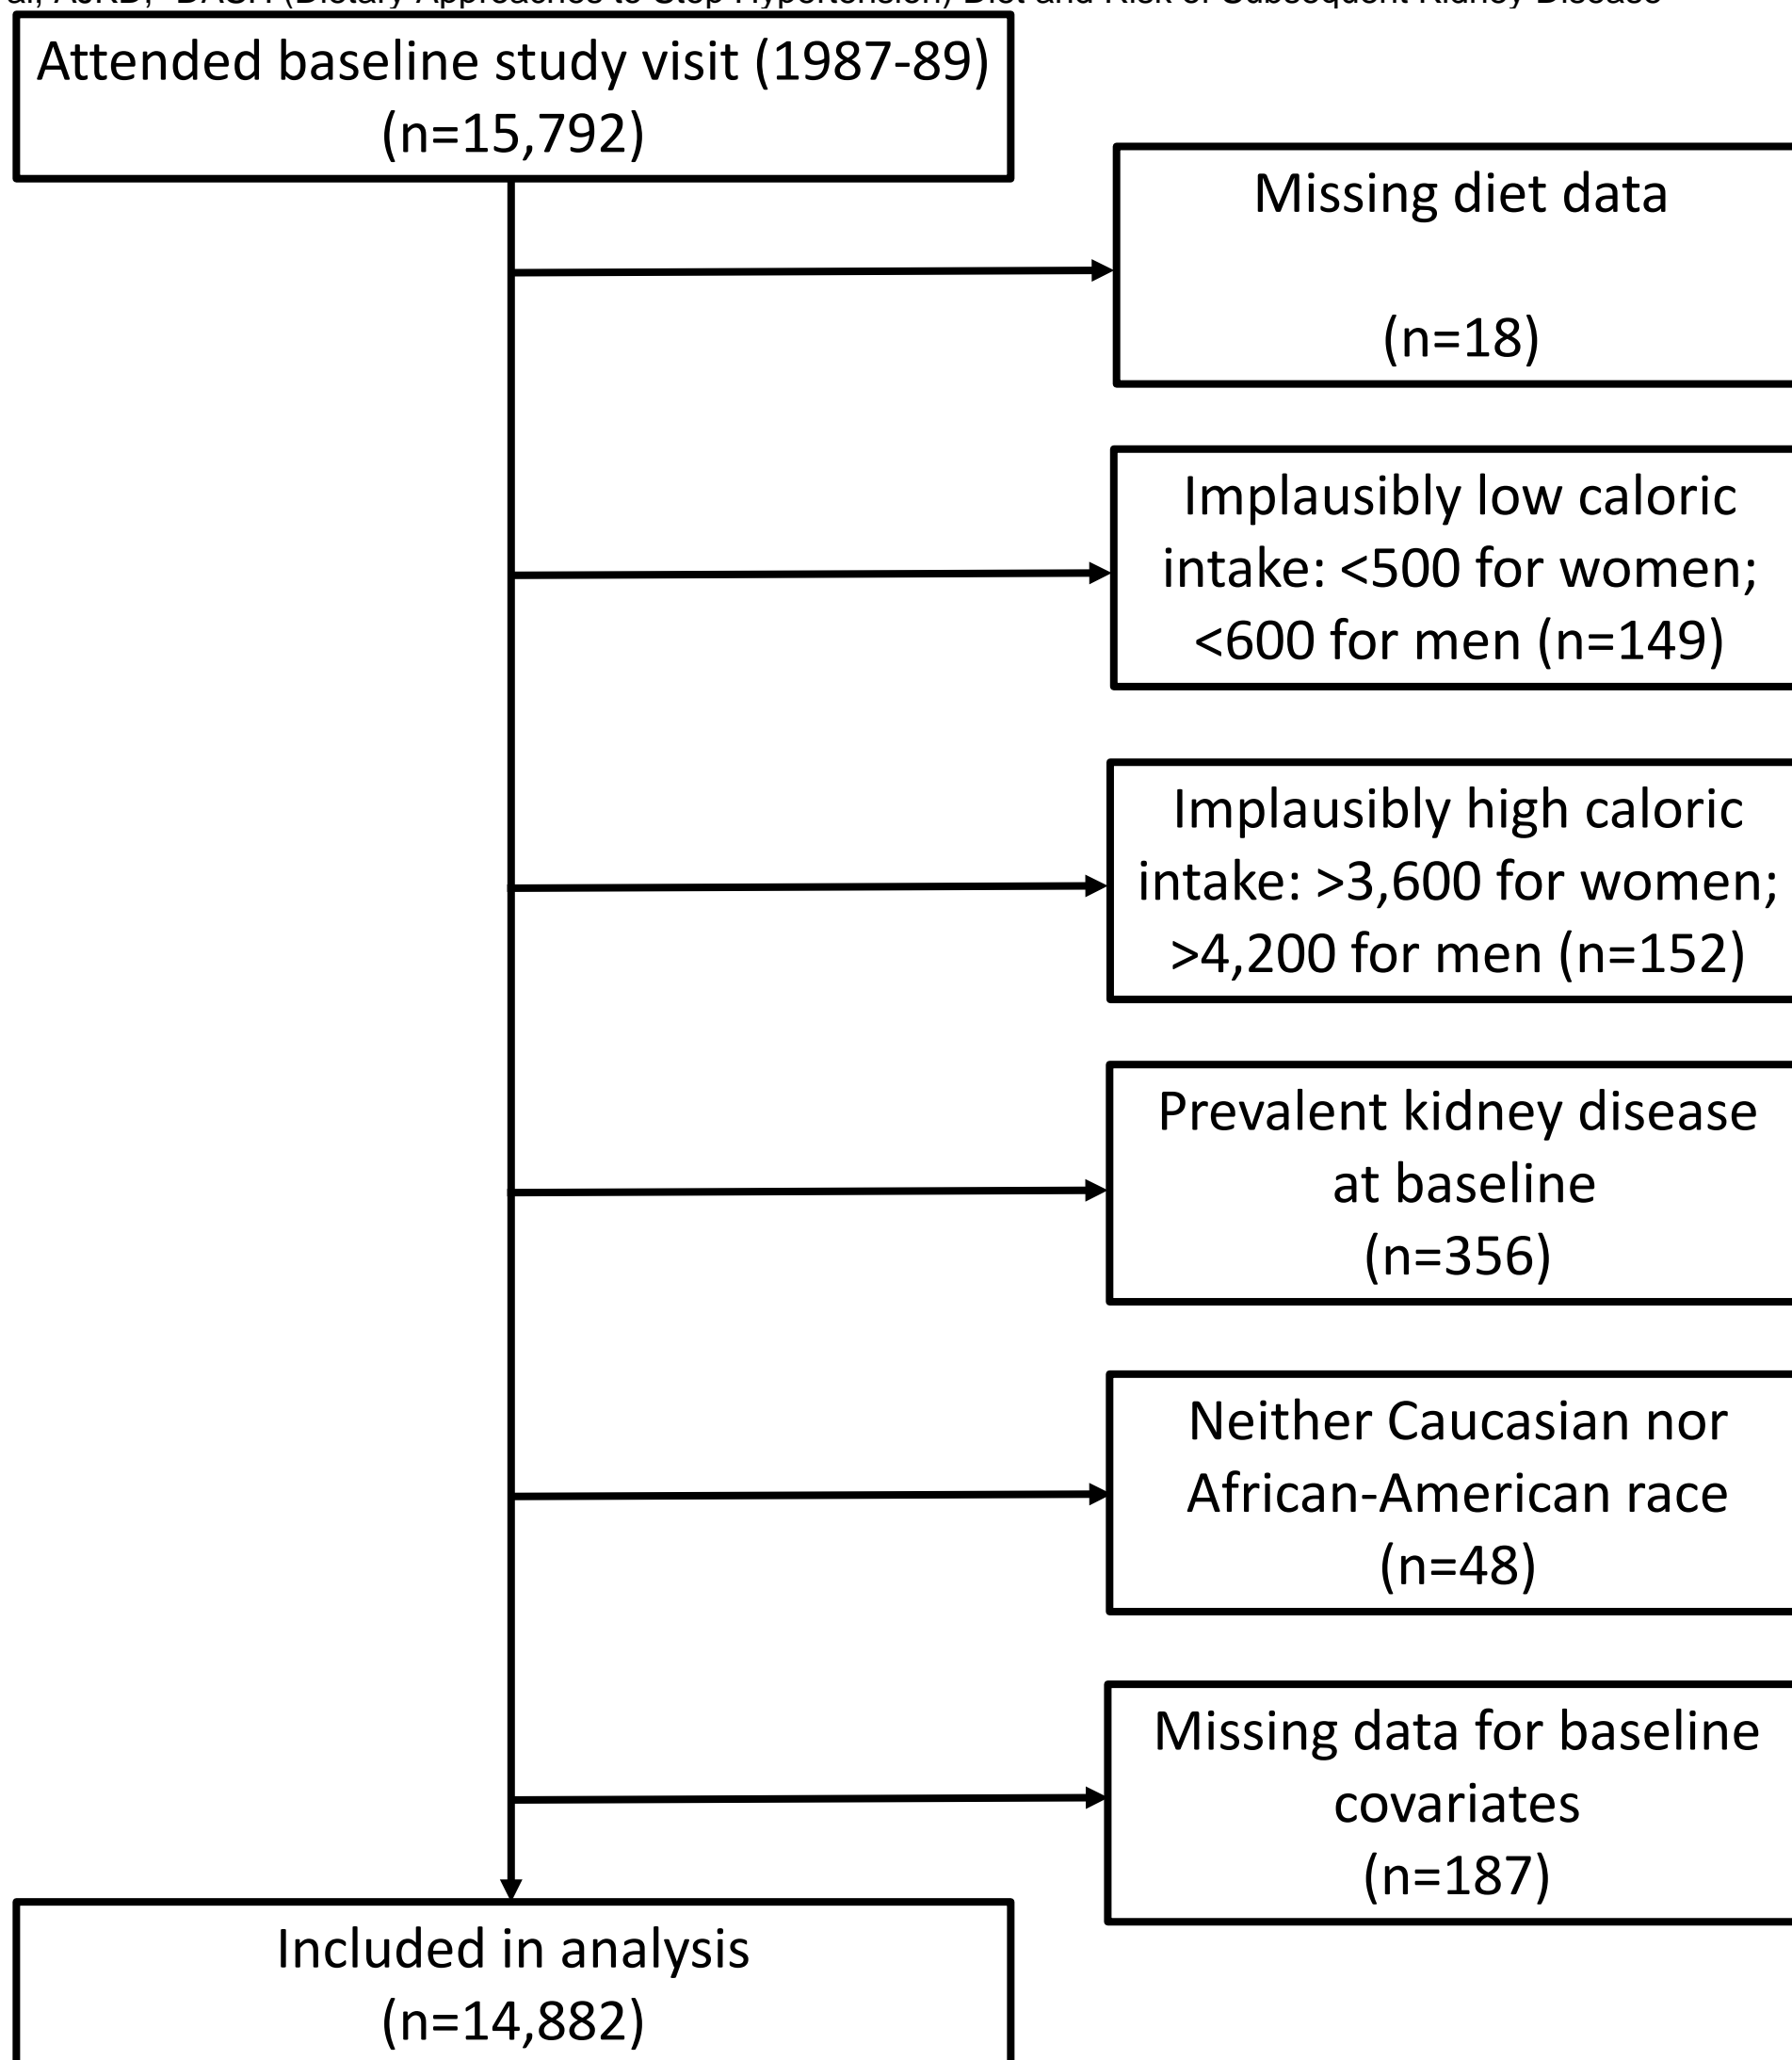

Supplement: NIHMS801066-supplement-1.pdf [file NIHMS801066-supplement-1.pdf]
